# Supplementary material
Source: PubMed Central journal article supplement (PMC9977227)
Supplement: glac088_suppl_supplementary_material.pdf [file glac088_suppl_supplementary_material.pdf]

# **Associations of late-life sleep medication use with incident dementia in the Atherosclerosis Risk in Communities (ARIC) Study**

## **Supplemental Materials**

### **Table of Contents:**

1. Supplemental Figure 1. Atherosclerosis Risk in Communities (ARIC) Study: Late-life sleep medication use analytic sample flow chart
2. Supplemental Table 1. Medications included in sleep medication definition by medication class
3. Supplemental Table 2. ARIC Participant characteristics of pre-match and matched samples
4. Supplemental Table 3. Late-life sleep medication use and risk of dementia, excluding individuals with dementia within 1 year (N=4,162)
5. Supplemental Table 4. Late-life sleep medication use and risk of dementia in sample matched on all covariates

**Supplemental Figure 1.** Atherosclerosis Risk in Communities (ARIC) Study:  
Late-life sleep medication use analytic sample flow chart

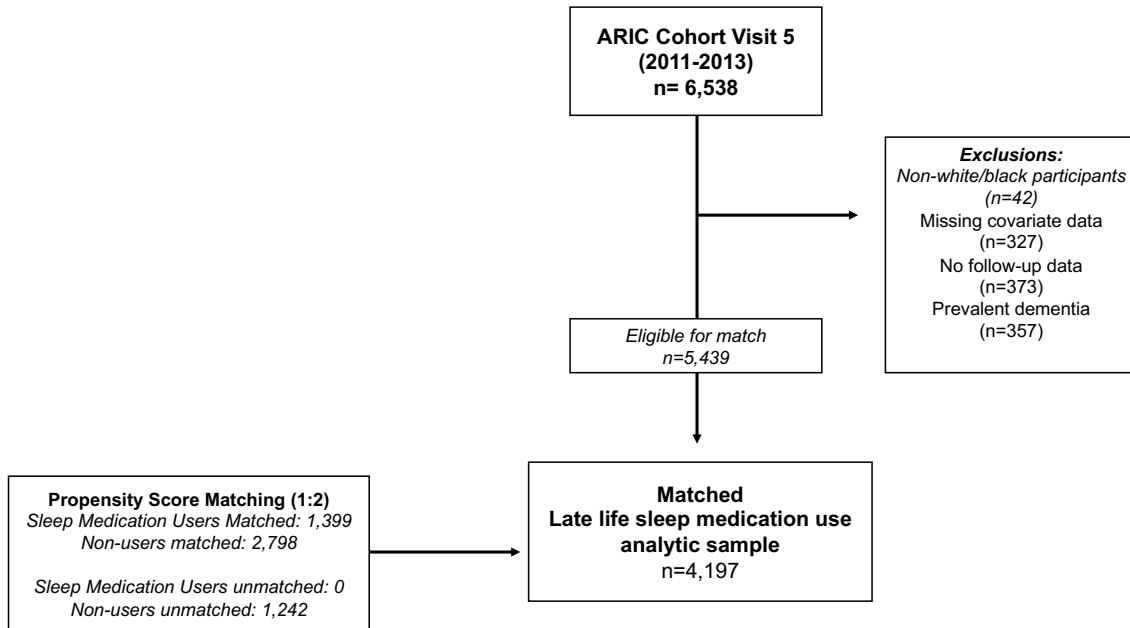

**Supplemental Table 1. Medications included in sleep medication definition by medication class**

| <b>Barbiturates<br/>(n=17)</b>                                                                                                                                                          | <b>N (%)*</b> | <b>Benzodiazepine<br/>Derivatives<br/>(n=448)</b>                                                                                                   | <b>N (%)*</b> | <b>Antidepressants</b>                                                                                                                                                                                           | <b>N (%)*†</b> | <b>Hypnotics<br/>(n=242)</b>                                                                                                                                           | <b>N (%)*</b> | <b>Non-<br/>benzodiazepine<br/>sedatives (Z-drugs)<br/>(n=149)</b>                                                  | <b>N (%)*</b> |
|-----------------------------------------------------------------------------------------------------------------------------------------------------------------------------------------|---------------|-----------------------------------------------------------------------------------------------------------------------------------------------------|---------------|------------------------------------------------------------------------------------------------------------------------------------------------------------------------------------------------------------------|----------------|------------------------------------------------------------------------------------------------------------------------------------------------------------------------|---------------|---------------------------------------------------------------------------------------------------------------------|---------------|
| <b>non-SSRIs<br/>(n=367)</b>                                                                                                                                                            |               |                                                                                                                                                     |               |                                                                                                                                                                                                                  |                |                                                                                                                                                                        |               |                                                                                                                     |               |
| <b>Xanthines</b><br><i>Aminophylline,<br/>Dyphylline,<br/>Theophylline,<br/>Theophylline in<br/>Dextrose</i>                                                                            | 9 (53%)       | <b>Benzodiazepines</b><br><i>Alprazolam,<br/>Chlordiazepoxide,<br/>Clorazepate<br/>Dipotassium,<br/>Diazepam, Lorazepam,<br/>Oxazepam, Prazepam</i> | 327 (73%)     | <b>Monoamine Oxidase<br/>Inhibitors (MAOIs)</b><br><i>Isocarboxazide, Phenelzine<br/>Sulfate, Selegiline,<br/>Tranlycypromine Sulfate</i>                                                                        | 1 (0.3%)       | <b>Non-Barbiturate<br/>Hypnotics</b><br><i>Chloral Hydrate,<br/>Paraldehyde</i>                                                                                        | 0 (0%)        | <b>Non-Benzodiazepine -<br/>GABA-Receptor<br/>Modulators</b><br><i>Zolpidem Tartrate,<br/>Eszopiclone, Zaleplon</i> | 149 (100%)    |
| <b>Xanthine-<br/>Expectorants</b><br><i>Dyphylline-Guaifenesin,<br/>Theophylline-<br/>Guaifenesin,<br/>Theophylline Sodium</i>                                                          | 1 (5.9%)      | <b>Benzodiazepine<br/>Hypnotics</b><br><i>Estazolam, Flurazepam,<br/>Midazolam, Quazepam,<br/>Temazepam, Triazolam</i>                              | 34 (7.6%)     | <b>Serotonin-Norepinephrine<br/>Reuptake Inhibitors<br/>(SNRIs)</b><br><i>Desvenlafaxine<br/>Succinate, Duloxetine HCl,<br/>Venlafaxine HCl</i>                                                                  | 98 (26.7%)     | <b>Antihistamine<br/>Hypnotics</b><br><i>Doxylamine Succinate,<br/>Diphenhydramine HCl</i>                                                                             | 46 (19.0%)    | <b>Zolpidem &amp; Dietary<br/>Management Product</b>                                                                | 0 (0%)        |
| <b>Xanthine-<br/>Sympathomimetics-<br/>Expectorant</b><br><i>Theophylline-PSE-GG</i>                                                                                                    | 0 (0%)        | <b>Anticonvulsants -<br/>Benzodiazepines</b><br><i>Clonazepam,<br/>Diazepam<br/>(Anticonvulsant)</i>                                                | 86 (19.2%)    | <b>Tricyclic Agents</b><br><i>Amitriptyline HCl,<br/>Amoxapine, Clomipramine<br/>HCl, Desipramine HCl,<br/>Doxepin HCl, Imipramine<br/>HCl, Imipramine Pamoate,<br/>Nortriptyline HCl,<br/>Protriptyline HCl</i> | 144 (39.2)     | <b>Antihistamine<br/>Hypnotic<br/>Combinations</b><br><i>Diphenhydramine –<br/>APAP, Ibuprofen<br/>Diphenhydramine<br/>Citrate, Ibuprofen-<br/>Diphenhydramine HCl</i> | 196 (81.0%)   |                                                                                                                     |               |
| <b>Xanthine-Nutritional<br/>Supplement<br/>Combinations</b>                                                                                                                             | 0 (0%)        | <b>Benzodiazepine-<br/>Nutritional<br/>Combination</b><br><i>Alprazolam-Dietary,<br/>Diazepam-Dietary,<br/>Temazepam-Dietary</i>                    | 0 (0%)        | <b>Tricyclic Agents-<br/>Nutritional Combination</b><br><i>Amitriptyline HCl - Dietary</i>                                                                                                                       | 0 (0%)         | <b>Hypnotic Tricyclic<br/>Agents Combinations</b><br><i>Doxepin HCl (sleep)</i>                                                                                        | 0 (0%)        |                                                                                                                     |               |
| <b>Barbiturate Hypnotics</b><br><i>Amobarbital Sodium,<br/>Butabarbital Sodium,<br/>Mephobarbital,<br/>Pentobarbital,<br/>Phenobarbital,<br/>Phenobarbital,<br/>Secobarbital Sodium</i> | 7 (41.2%)     | <b>Benzodiazepines &amp;<br/>Tricyclic Agents</b><br><i>Chlordiazepoxide-<br/>Amitriptyline</i>                                                     | 1 (0.2%)      | <b>Tetracyclics &amp; Other<br/>Antidepressants</b><br><i>Mirtazapine (25),<br/>Maprotiline HCl (0),<br/>Bupropion HCl (47),<br/>Bupropion Hydrobromide<br/>(0), Trazodone HCl (90)</i>                          | 153 (41.7%)    |                                                                                                                                                                        |               |                                                                                                                     |               |
|                                                                                                                                                                                         |               |                                                                                                                                                     |               | <b>Antidepressant-<br/>Nutritional Combinations</b><br><i>Trazodone- Dietary (4)</i>                                                                                                                             | 4 (1.0%)       |                                                                                                                                                                        |               |                                                                                                                     |               |
|                                                                                                                                                                                         |               |                                                                                                                                                     |               | <b>Selective Serotonin<br/>Reuptake Inhibitors<br/>(SSRIs) n=505</b>                                                                                                                                             | <b>N*†</b>     |                                                                                                                                                                        |               |                                                                                                                     |               |
|                                                                                                                                                                                         |               |                                                                                                                                                     |               | <i>Citalopram Hydrobromide<br/>(158), Escitalopram Oxalate<br/>(61), Fluoxetine HCl (66),<br/>Fluvoxamine Maleate (0),<br/>Paroxetine HCl (66),<br/>Sertraline HCl (156)</i>                                     | 506 (100%)     |                                                                                                                                                                        |               |                                                                                                                     |               |

\*Percentages calculated within drug class.

†numbers do not sum to total N for medication class due to individuals taking more than 1 medication

**Supplemental Table 2. ARIC Participant characteristics of pre-match and matched samples**

|                                                  | Pre-matched Sample<br>(n=5439) |                                    | Matched Sample<br>(n=4197) |                                    |
|--------------------------------------------------|--------------------------------|------------------------------------|----------------------------|------------------------------------|
|                                                  | Non-users<br>(n=4040)          | Sleep Medication users<br>(n=1399) | Non-users<br>(n=2798)      | Sleep Medication users<br>(n=1399) |
| <b>Demographics</b>                              |                                |                                    |                            |                                    |
| Baseline age, years                              | 75.3 ± 5.0                     | 75.2 ± 5.0                         | 75.3 ± 5.0                 | 75.2 ± 5.0                         |
| Female, n (%)                                    | 2234 (55.3)                    | 990 (70.8)                         | 1972 (70.5)                | 990 (70.8)                         |
| White, n (%)                                     | 3073 (76.1)                    | 1190 (85.1)                        | 2325 (83.1)                | 1190 (85.1)                        |
| Education Level, n (%)                           |                                |                                    |                            |                                    |
| < high school                                    | 528 (13.1)                     | 180 (12.9)                         | 400 (14.3)                 | 180 (12.9)                         |
| high school graduate                             | 1672 (41.4)                    | 631 (45.1)                         | 1179 (42.1)                | 631 (45.1)                         |
| > high school graduate                           | 1840 (45.5)                    | 588 (42.0)                         | 1219 (43.6)                | 588 (42.0)                         |
| APOE ε4, n (%)                                   | 1106 (27.4)                    | 349 (24.9)                         | 734 (26.2)                 | 349 (24.9)                         |
| <b>Lifestyle + Health Status Characteristics</b> |                                |                                    |                            |                                    |
| Current Smoker, n (%)                            | 232 (5.7)                      | 99 (7.1)                           | 160 (5.7)                  | 99 (7.1)                           |
| Current Alcohol consumption, n (%)               | 2036 (50.4)                    | 670 (47.9)                         | 1432 (51.2)                | 670 (47.9)                         |
| Depression (CES-D Score ≥9), n (%)               | 186 (4.6)                      | 157 (11.2)                         | 131 (4.7)                  | 157 (11.2)                         |
| BMI, kg/m <sup>2</sup>                           | 28.8 ± 5.6                     | 28.9 ± 5.9                         | 28.6 ± 5.7                 | 28.9 ± 5.9                         |
| <b>Cardiovascular Risk Factors</b>               |                                |                                    |                            |                                    |
| Systolic BP, mmHg                                | 130.0 ± 17.9                   | 129 ± 18.0                         | 130.0 ± 18.1               | 129 ± 18.0                         |
| Prevalent Diabetes, n (%)                        | 1094 (27.1)                    | 415 (29.7)                         | 715 (25.6)                 | 415 (29.7)                         |
| Prevalent CHD, n (%)                             | 619 (15.3)                     | 230 (16.4)                         | 370 (13.2)                 | 230 (16.4)                         |
| Anti-hypertensive Medication use, n (%)          | 2975 (73.6)                    | 1084 (77.5)                        | 1990 (71.1)                | 1084 (77.5)                        |

Presented as mean ± SD unless otherwise noted

**Supplemental Table 3. Late-life sleep medication use and risk of dementia, excluding individuals with dementia within 1 year (N=4,162)\***

|                          | <b>Matched Non-Users<br/>(n=2,783)</b>         | <b>Sleep Medication Users<br/>(n=1,379)</b> |
|--------------------------|------------------------------------------------|---------------------------------------------|
| Incident Dementia, n     | 352                                            | 245                                         |
| <b>Model<sup>†</sup></b> | <b>Hazard Ratio (95% Confidence Intervals)</b> |                                             |
| Model 1                  | (reference)                                    | <b>1.48 (1.26, 1.74)</b>                    |
| Model 2                  | (reference)                                    | <b>1.54 (1.31, 1.81)</b>                    |
| Model 3                  | (reference)                                    | <b>1.45 (1.23, 1.71)</b>                    |
| Model 4                  | (reference)                                    | <b>1.44 (1.22, 1.70)</b>                    |

\* Matched sample 2:1

† Model Adjustments: Model 1: Crude unadjusted; Model 2: Adjusted for age, sex, race-center, education, and APOE; Model 3: Model 2 + adjustment for smoking status, alcohol consumption, depression, and BMI; Model 4: Model 3 + adjustment for systolic blood pressure, anti-hypertensive medications, prevalent diabetes and prevalent CHD

**Supplemental Table 4. Late-life sleep medication use and risk of dementia in sample matched on all covariates**

|                                           | <b>Matched<br/>Non-Users<br/>(n=2,798)</b> | <b>Sleep Medication<br/>Users<br/>(n=1,399)</b> |
|-------------------------------------------|--------------------------------------------|-------------------------------------------------|
| Incident Dementia, n                      | 388                                        | 265                                             |
| <i>Cumulative Incidence</i>               | 13.9%                                      | 18.9%                                           |
| <i>Incidence Rate, per 100 person-yrs</i> | 2.25                                       | 3.17                                            |
| Model <sup>†</sup>                        | Hazard Ratio (95% Confidence Intervals)    |                                                 |
| Model 1                                   | (reference)                                | <b>1.43 (1.22, 1.67)</b>                        |
| Model 2                                   | (reference)                                | <b>1.59 (1.36, 1.86)</b>                        |
| Model 3                                   | (reference)                                | <b>1.47 (1.25, 1.72)</b>                        |
| Model 4                                   | (reference)                                | <b>1.45 (1.24, 1.70)</b>                        |

\*Matched sample 2:1  
Model Adjustments: Model 1: Crude unadjusted; Model 2: Adjusted for age, sex, race-center, education and APOE; Model 3: Model 2 + adjustment for smoking status, alcohol consumption, depression, and BMI; Model 4: Model 3 + adjustment for systolic blood pressure, anti-hypertensive medications, prevalent diabetes, and prevalent CHD
